# Supplementary material for: Hypoxic Reactive Oxygen Species Regulate the Integrated Stress Response and Cell Survival
Source: PubMed Central journal article supplement — J Biol Chem. 2008 Nov 7;283(45):31153–62. doi: 10.1074/jbc.M805056200 (PMC2576535; doi:10.1074/jbc.m805056200), 2008-11-07

Supplementary Figure 1. **Effects of H<sub>2</sub>O<sub>2</sub> on mRNA translation and cell survival.** A) MEF viability measured immediately after 1 hr H<sub>2</sub>O<sub>2</sub> (0-100  $\mu$ M) exposure by trypan blue stain. B) Comparison of normoxia (N), hypoxia (Hyp) (0.5% O<sub>2</sub>, 8 and 24 hr), H<sub>2</sub>O<sub>2</sub> (R), (1 hr, 100  $\mu$ M), and thapsigargin (T), (0.8  $\mu$ M, 4 hr) effects on PERK protein mobility and eIF2 $\gamma$  phosphorylation.

Supplementary Figure 2. **Comparison of intracellular ROS levels in cells grown in moderate hypoxia versus H<sub>2</sub>O<sub>2</sub>.** Flow cytometry was used to evaluate 2', 7'-dichlorofluorescein-diacetate (DCFH-DA) fluorescence in cells exposed to 0.5% O<sub>2</sub> and 25  $\mu$ M H<sub>2</sub>O<sub>2</sub> (A) or 100  $\mu$ M H<sub>2</sub>O<sub>2</sub> (B). As shown here, 100  $\mu$ M H<sub>2</sub>O<sub>2</sub> treatment is closer to ROS levels achieved in cells grown at 0.5% O<sub>2</sub> than 25  $\mu$ M H<sub>2</sub>O<sub>2</sub>.

Supplementary Figure 3. **Catalase expression suppresses ROS-activated ISR.** Effects of H<sub>2</sub>O<sub>2</sub> (20  $\mu$ M, 6 hr, replenished every 2 hrs) on the expression of ATF4 target genes GADD34, BiP, and CHOP (A) and PGK (B) in HEK293 cells transfected with catalase (CAT) or empty vector. \*\*, P<0.01.

**A**

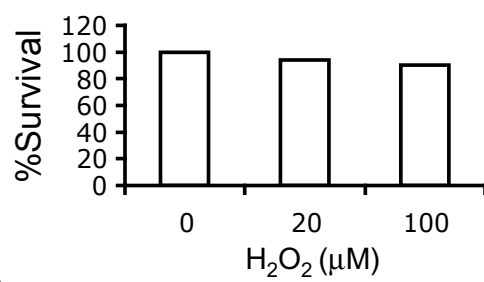

**B**

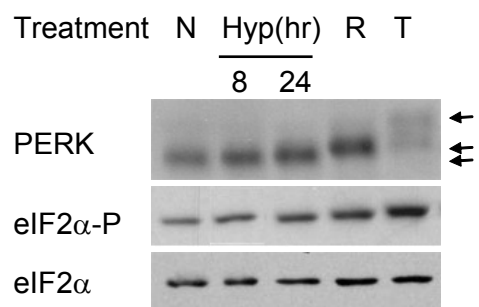

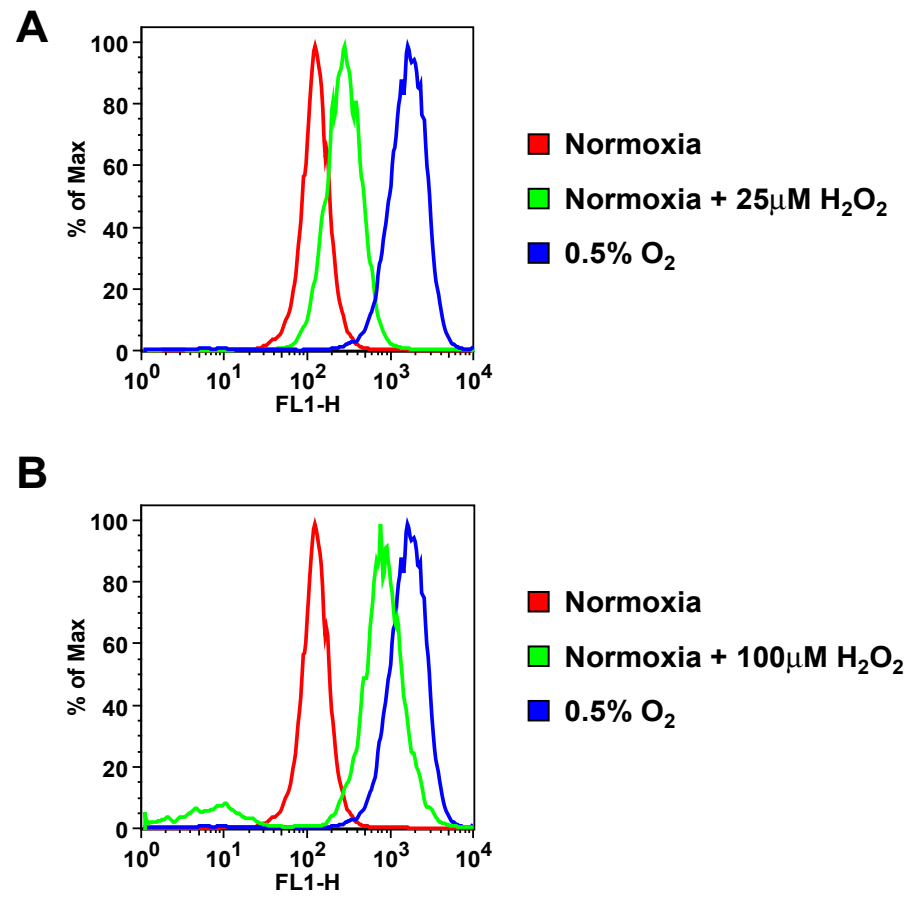

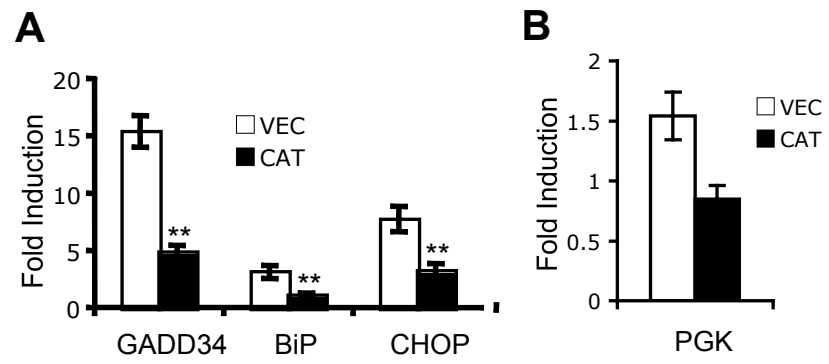

Supplement: M805056200_1.pdf [file M805056200_1.pdf]
